# Supplementary material
Source: Royal Society of Chemistry journal article supplement (doi:10.1039/d6cp00466k)
Supplement: d6cp00466k1.pdf [file d6cp00466k1.pdf]

Supplementary Information for  
**The Role of Sulfur Vacancies on FeS<sub>2</sub>(100) for NO Dissociative Adsorption: a  
Combined in-situ SR-XPS and DFT Calculation**

Wei-Chih Hsiao,<sup>a</sup> Fumihiko Ozaki, <sup>†a</sup> Kozo Mukai,<sup>a</sup> Shunsuke Tanaka,<sup>‡a</sup> Daisuke Nishio-Hamane,<sup>a</sup>  
Masahiro Fukuda,<sup>a</sup> Taisuke Ozaki,<sup>a</sup> and Jun Yoshinobu<sup>\*a</sup>

<sup>a</sup>The Institute for solid state physics, The University of Tokyo, Chiba, 2770882, Japan.

<sup>†</sup> Present address: Research and Development Directorate, Japan Aerospace Exploration Agency  
(JAXA), Sagami-hara, Kanagawa, 2525210, Japan.

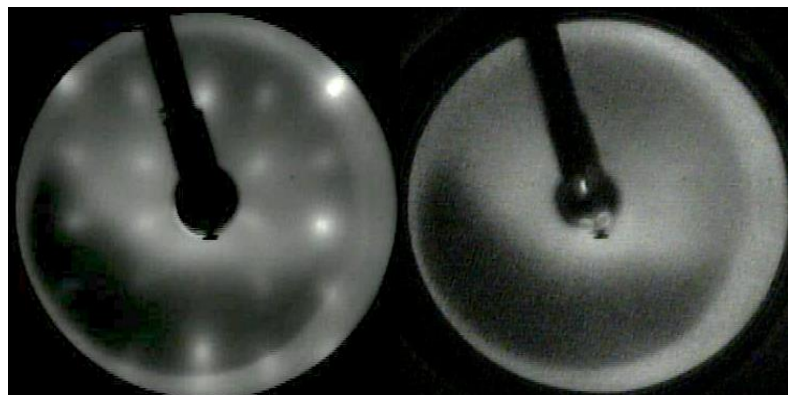

**Fig S1.** (1×1) LEED pattern of the low- $S_{vac}$  (left), and high- $S_{vac}$  (right)  $FeS_2(100)$  surfaces, recorded at an electron beam energy of 110 eV.

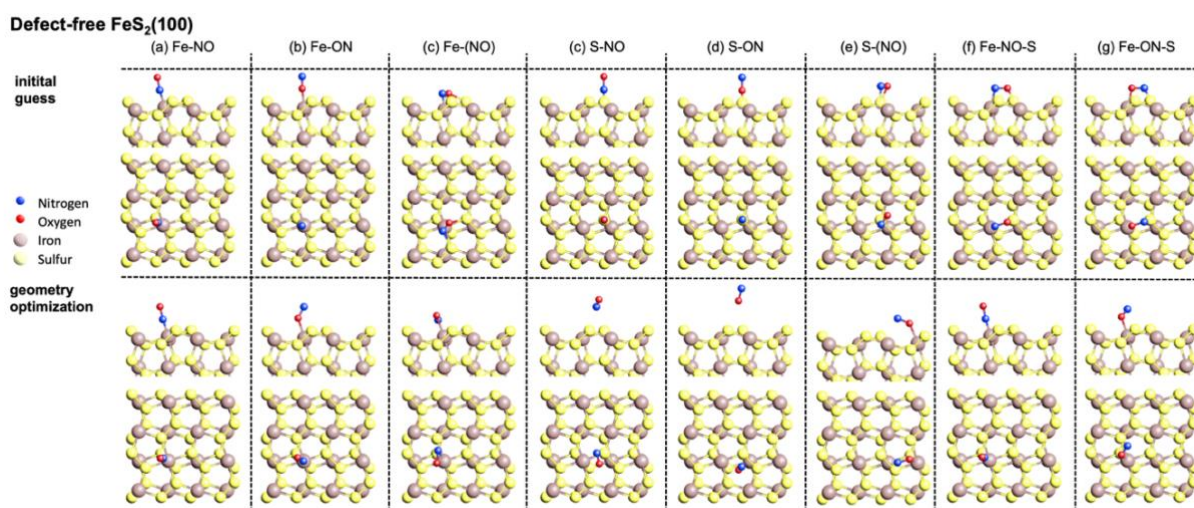

**Fig S2.** Side view (upper) and top view (lower) of optimized geometries of defect-free  $FeS_2(100)$  surfaces for various adsorbate configurations. Top and bottom rows represent the initial adsorption geometries and the structures after geometry optimization, respectively. Color scheme: nitrogen (blue), oxygen (red), iron (brown), and sulfur (yellow).

**Table S1.** Calculated adsorption energy ( $\Delta E_{ads}$ ), N–O bond length ( $d(N-O)$ ), and charge transfer ( $\Delta Q$ , Mulliken analysis) for NO adsorption on defect-free  $FeS_2(100)$  surfaces with different initial adsorption configurations on defect-free  $FeS_2(100)$  surfaces. The most stable configurations are highlighted in red.

| Initial guess  | $\Delta E_{ads}$ (eV) | $d(N-O)$    | $\Delta Q$ of NO (e) |
|----------------|-----------------------|-------------|----------------------|
| <b>Fe-NO</b>   | <b>-2.01</b>          | <b>1.19</b> | <b>0.09</b>          |
| Fe-ON          | -0.95                 | 1.22        | 0.15                 |
| Fe-(NO)        | -0.94                 | 1.19        | 0.19                 |
| S-NO           | -0.40                 | 1.20        | 0.09                 |
| S-ON           | -0.23                 | 1.20        | 0.05                 |
| S-(NO)         | -0.37                 | 1.21        | 0.08                 |
| <b>Fe-NO-S</b> | <b>-2.01</b>          | <b>1.19</b> | <b>0.08</b>          |
| Fe-ON-S        | -0.93                 | 1.22        | 0.15                 |

### Defective FeS<sub>2</sub>(100)

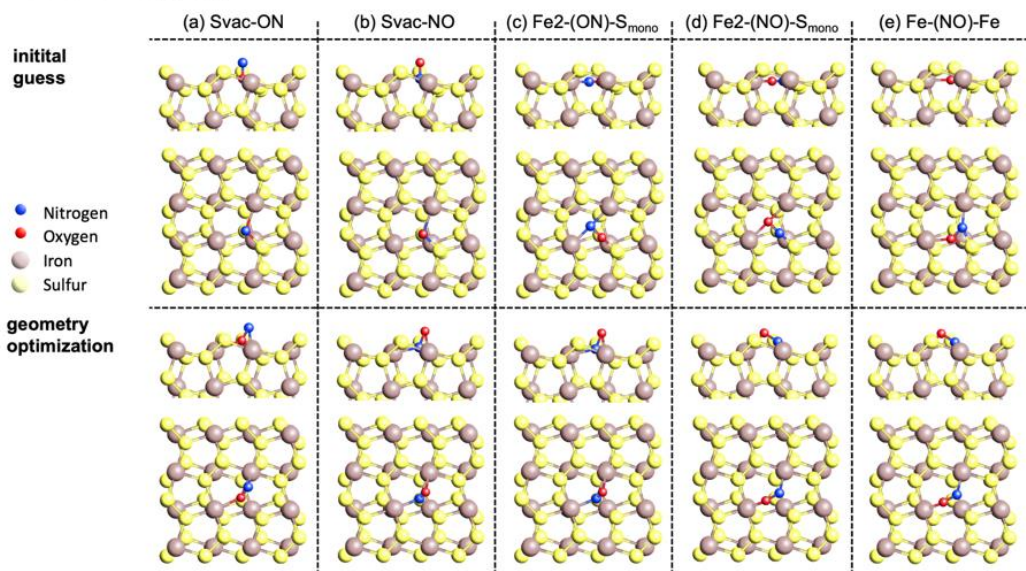

**Fig S3.** Side view (upper) and top view (lower) of optimized geometries of defective FeS<sub>2</sub>(100) surfaces with a sulfur vacancy (Svac) for various NO adsorption configurations. Top and bottom rows represent the initial adsorption geometries and the structures after geometry optimization, respectively. Color scheme: nitrogen (blue), oxygen (red), iron (brown), and sulfur (yellow).

**Table S2.** Adsorption energy ( $\Delta E_{\text{ads}}$ ), N–O bond length ( $d(\text{N–O})$ ), and charge transfer ( $\Delta Q$ , Mulliken analysis) for NO adsorption on defective FeS<sub>2</sub>(100) surfaces with a sulfur vacancy (Svac) in various configurations on defective FeS<sub>2</sub>(100) surfaces. The most stable configurations are highlighted in red.

| Initial gauss                    | $\Delta E_{\text{ads}}$ (eV) | $d(\text{N–O})$ | $\Delta Q$ of NO (e) |
|----------------------------------|------------------------------|-----------------|----------------------|
| Svac-ON                          | -1.75                        | 1.29            | 0.37                 |
| <b>Svac-NO</b>                   | <b>-3.09</b>                 | <b>1.31</b>     | <b>0.40</b>          |
| <b>Fe2-(ON)-S<sub>mono</sub></b> | <b>-3.10</b>                 | <b>1.31</b>     | <b>0.39</b>          |
| Fe2-(NO)-S <sub>mono</sub>       | -2.86                        | 1.27            | 0.35                 |
| Fe-(NO)-Fe                       | -2.84                        | 1.27            | 0.36                 |

The sulfur-vacancy formation energies for the FeS<sub>2</sub>(100) surface were calculated, and we obtained  $\Delta H = 0.12$  eV based on eqn (1) and 0.09 eV based on eqn (2). These values suggest that sulfur-vacancy formation is thermodynamically accessible. We note that in our experiments sulfur vacancies were mainly created by Ar<sup>+</sup> sputtering (non-thermal process).

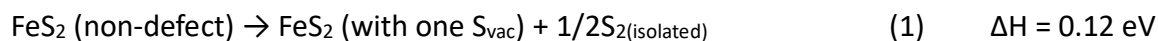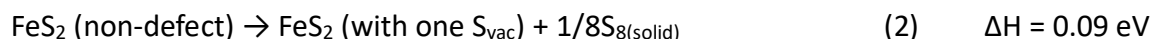

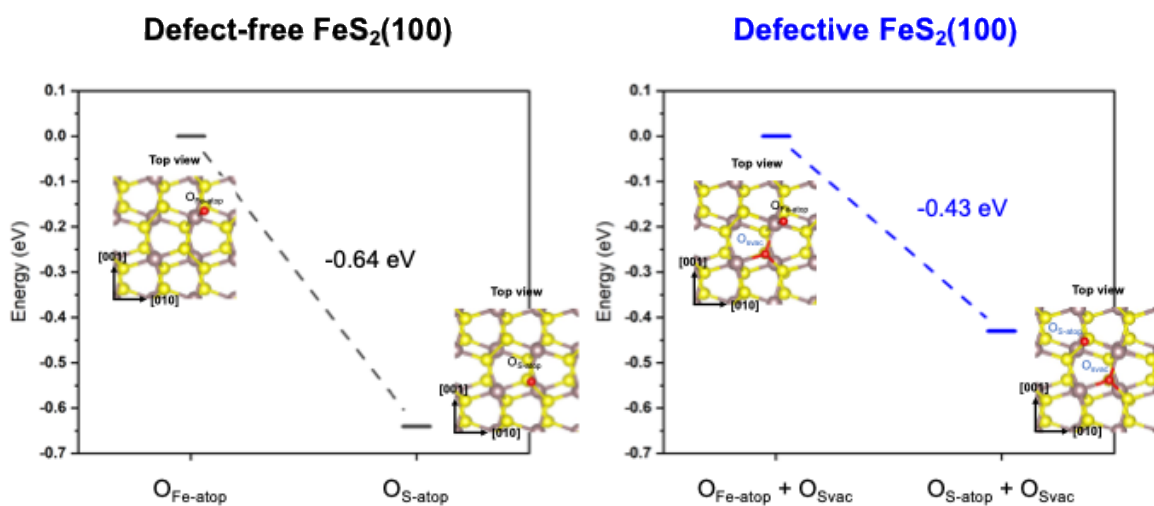

**Fig S4.** DFT-D3 calculated relative stabilities of atomic oxygen adsorbed at Fe-atop and S-atop sites on defect-free and defective  $\text{FeS}_2(100)$  surfaces. On both surfaces, oxygen adsorption at the S-atop site is energetically more favourable than at the Fe-atop site, with energy differences of  $-0.64$  eV for the defect-free surface and  $-0.43$  eV for the defective surface. Representative optimized adsorption geometries are shown as insets.

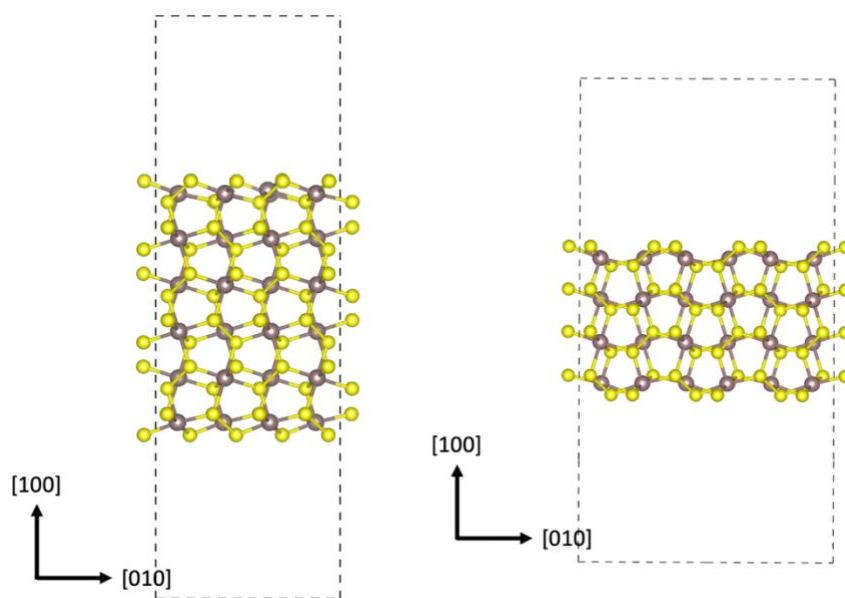

**Fig S5.** DFT-D3 calculated  $(3 \times 2 \times 2)$  slab model for geometry optimizations (**left**) and  $(2 \times 3 \times 3)$  slab model for absolute binding energy calculations (**right**)
